# Supplementary material for: Tailoring and probing particle–polymer interactions in PMMA/silica nanocomposites
Source: Royal Society of Chemistry journal article supplement (doi:10.1039/c1sm05668a), 2011-01-01

**Figure S1.** Contact angle measurements of pure ethylene glycol droplets on (a) neat PMMA; and (b) neat PMMA/MAA at  $T - T_g \sim 12^\circ\text{C}$  ( $T \sim 145^\circ\text{C}$  for PMMA, and  $T \sim 130^\circ\text{C}$  for PMMA/MAA). Surface tension is calculated directly from these average contact angles, since this solvent does not evaporate at these elevated temperatures, as discussed in the text.

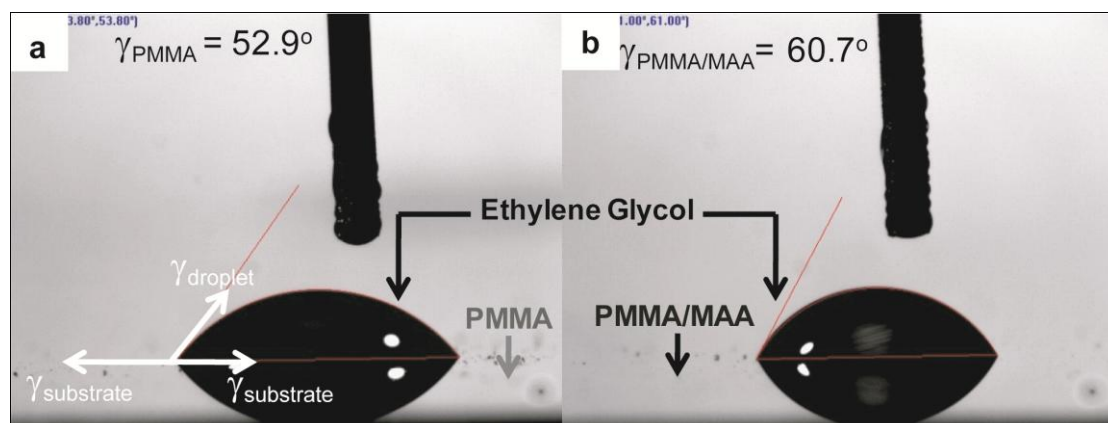

Supplement: c1sm05668a.pdf [file c1sm05668a.pdf]
